# Supplementary material
Source: HighWire-hosted journal article supplement (https://openres.ersjournals.com/content/6/4/00438-2020)
Supplement: inline-supplementary-material-1 [file inline-supplementary-material-1.pdf]

## Cover sheet Online Data Supplement

### Manuscript title

**Treatable traits qualifying for non-pharmacological interventions in COPD patients upon first referral to a pulmonologist: the COPD *sTRAITosphere***

### Authors:

Alex J. van 't Hul<sup>1</sup>, Eleonore H. Koolen<sup>1</sup>, Jeanine C. Antons<sup>1</sup>, Marianne de Man<sup>2</sup>, Remco S. Djamin<sup>3</sup>, Johannes C.C.M. in 't Veen<sup>4</sup>, Sami O. Simons<sup>5</sup>, Michel van den Heuvel<sup>1</sup>, Bram van den Borst<sup>1</sup>, Martijn A. Spruit<sup>5,6,7</sup>

<sup>1</sup> Radboud university medical center, Radboud Institute for Health Sciences, Department of Respiratory Diseases, 6525 GA Nijmegen, The Netherlands

<sup>2</sup> Bernhoven, Department of Respiratory Diseases, 5406 PT Uden, The Netherlands

<sup>3</sup> Department of Respiratory Diseases, Amphia Hospital, 4818 CK Breda, The Netherlands

<sup>4</sup> Department of Respiratory Diseases, STZ Centre of Excellence for Asthma & COPD, Franciscus Gasthuis & Vlietland Hospital, 3045 PM Rotterdam, The Netherlands

<sup>5</sup> Department of Respiratory Medicine, Maastricht University Medical Centre, NUTRIM School of Nutrition and Translational Research in Metabolism, 6229 HX Maastricht, The Netherlands

<sup>6</sup> Department of Research and Development, CIRO+, 6085 NM Horn, The Netherlands

<sup>7</sup> REVAL-Rehabilitation Research Center, BIOMED-Biomedical Research Institute, Faculty of Rehabilitation Sciences, Hasselt University, 3590 BE Diepenbeek, Belgium

## **Material and Methods**

### ***Study participants***

All patients with a confirmed diagnosis of COPD, with a first-time referral between October 2014 and December 2018 to the outpatient respiratory department of Radboudumc, Nijmegen, and Bernhoven Hospital, Uden, both in The Netherlands, were deemed eligible for participation providing they had been free of an acute exacerbation for  $\geq 3$  months. The study was conducted in accordance with European Union directive 2001/20/EC and the Declaration of Helsinki. The Research Ethics Committee of the Radboud University Medical Centre approved the study and considered that the study protocol did not fall within the remit of the Medical Research Involving Human Subjects Act (WMO). Due to the observational nature of the study and the provision of usual care, written informed consent was waived (ref: 2017/3597).

### ***Study design***

This is a multicenter, ambispective, observational study. In the prospective study, upon referral by a GP, patients were assessed in a standardized, comprehensive diagnostic care pathway. This diagnostic trajectory sets out to assess individual determinants of the burden of disease (TTs), and to reveal options to increase activation for self-management.(1, 2) This pathway consisted of two visits within exactly one week and another third visit four weeks later. On the first visit, patients had a consultation with both the pulmonologist and respiratory nurse and underwent a series of assessments. On the second visit, all the results were reviewed in a face-to-face discussion between the respiratory nurse and the pulmonologist and subsequently communicated with the patient in two separate sessions. The pulmonologist focused on the biomedical aspects, whereas the respiratory nurse concentrated on the psychosocial and behavioral aspects. Four weeks later a final

consultation took place with the respiratory nurse in which the individual care plan was established and any agreements were made with respect to non-pharmacological interventions. In the meantime, additional diagnostic tests, such as extra blood testing, lung volume measurements or imaging and/or consultation with another subspecialist such as cardiologist could be completed, should the medical condition give rise to this.

### ***Health status assessment and determination of non-pharmacological treatable traits***

During the consultations with the pulmonologist and respiratory nurse on day one, the patients' medical history was taken including living situation, employment status, sick leave due to COPD in past 12 months and smoking status. A detailed registration was done of pulmonary medication and non-pharmacological intervention(s) for COPD as set up by the GP in the past 12 months. Comorbidities were recorded by the pulmonologist: (1) on the basis of the patient history, (2) what had been registered already in the electronic medical record, (3) what had been written in the referral letter from the GP, or, (4) what actual medication was used. Assessments included spirometry and flow-volume curve measurements before and after bronchodilator use (Salbutamol 400 µg), based on the Global Lung Initiative (GLI) equations (3) with reversibility defined as FEV<sub>1</sub> increase of ≥12% and at least 200 mL improvement(4), arterial blood gas analysis (5) with type 1 respiratory failure defined as P<sub>a</sub>O<sub>2</sub><8.0 kPa(6), peripheral blood analysis including eosinophil count. X-ray of the thorax and ECG were taken in patients with an age > 40 years. Between the first and the second visit, patients wore a move monitor for a week to objectify the level of physical activity.(7) To quantify patients perceived health status, that is, the individual burden of disease, the Clinical COPD Questionnaire (CCQ) was used.(8, 9) In addition, composite indices reflecting health status impairment in a multidimensional way were calculated, that is, the (CCQ-based) GOLD ABCD classification(6) , BODE index(10) and ADO

index(11). The following nine potential TTs qualifying for non-pharmacological interventions were appraised: current smoking, activity-related dyspnea (12), frequent acute exacerbations, defined as an acute worsening of respiratory symptoms that result in additional therapy, ( $\geq 2$  exacerbations past 12 months or  $\geq 1$  hospitalization past 12 months)(6), poor nutritional status(13), severe fatigue(14), depressed mood(15), poor exercise capacity(7), physical inactivity(7), and, a low level of activation for self-management.(16)

## Results

Table E1. Correlation matrix of the nine examined TTs

|               | Smoking | MRC  | Exacerbations | BMI   | CIS   | BDI   | 6MWD   | Steps/day | PAM    |
|---------------|---------|------|---------------|-------|-------|-------|--------|-----------|--------|
| Smoking       |         | 0.07 | 0.04          | 0.28* | -0.03 | -0.01 | -0.11* | -0.08     | -0.01  |
| MRC           |         |      | 0.27*         | 0.03  | 0.39* | 0.24* | -0.52* | -0.47*    | -0.16* |
| Exacerbations |         |      |               | -0.07 | 0.15* | 0.15* | -0.20* | -0.16*    | -0.13  |
| BMI           |         |      |               |       | -0.01 | -0.05 | -0.17* | -0.13*    | -0.14* |
| CIS           |         |      |               |       |       | 0.32* | -0.21* | -0.24*    | 0.26*  |
| BDI           |         |      |               |       |       |       | -0.12  | -0.11     | -0.22* |
| 6MWD          |         |      |               |       |       |       |        | 0.53*     | 0.10   |
| Steps/day     |         |      |               |       |       |       |        |           | 0.01   |
| PAM           |         |      |               |       |       |       |        |           |        |

\*=P<0.05; MRC=Medical Research Council dyspnea scale; BMI=Body Mass Index; BDI=Beck Depression Inventory; CIS= Checklist Individual Strength-Fatigue; 6MWD=6-minute walking distance; PAM=Patient Activation Measure.

Table E2. General and COPD-specific patient characteristics of the validation sample

| Attribute                                  |            | # patients with a valid registration |
|--------------------------------------------|------------|--------------------------------------|
| <b>Sociodemographic features:</b>          |            |                                      |
| Age, years                                 | 64±9       | 584 (100%)                           |
| Female, %                                  | 45         | 584 (100%)                           |
| Partnered, %                               | 72         | 547 (94%)                            |
| <b>Pulmonary function:</b>                 |            |                                      |
| FEV <sub>1</sub> % predicted               | 59±19      | 584 (100%)                           |
| FVC % predicted                            | 93±18      | 584 (100%)                           |
| FEV <sub>1</sub> /FVC ratio                | 0.48±0.12  | 584 (100%)                           |
| FEV <sub>1</sub> reversibility, % patients | 34         | 584 (100%)                           |
| GOLD class I/II/III/IV, %                  | 14/51/31/4 | 584 (100%)                           |
| <b>Blood gas analysis:</b>                 |            |                                      |
| Hb, mmol/L                                 | NA         |                                      |
| Hb<8.5 (male) or <7.5 (female), %          | NA         |                                      |
| pH                                         | 7.42±0.29  | 565 (97%)                            |
| PaCO <sub>2</sub> , kPa                    | 5.21±0.66  | 565 (97%)                            |
| PaCO <sub>2</sub> >6.5 kPa, %              | 3          | 565 (97%)                            |
| PaO <sub>2</sub> , kPa                     | NA         |                                      |
| PaO <sub>2</sub> <8.0 kPa, %               | NA         |                                      |
| BIC, mmol/L                                | 24.5±2.5   | 565 (97%)                            |

|                                                                          |                |            |
|--------------------------------------------------------------------------|----------------|------------|
| Base Excess                                                              | 0.15±1.99      | 565 (97%)  |
| SaO <sub>2</sub> , %                                                     | NA             |            |
|                                                                          |                |            |
| <b>Comorbidities:</b>                                                    |                |            |
| Charlson comorbidity index                                               | 3 (0-9)        | 364 (62%)  |
| Cardiovascular, %                                                        | NA             |            |
| Metabolic, %                                                             | NA             |            |
| Musculoskeletal, %                                                       | NA             |            |
| Psychiatric, %                                                           | NA             |            |
| Others, %                                                                | NA             |            |
|                                                                          |                |            |
| <b>Pulmonary medication:</b>                                             |                |            |
| Short acting bronchodilator(s), %                                        | NA             |            |
| Long acting bronchodilator(s), %                                         | NA             |            |
| Inhalation steroids, %                                                   | NA             |            |
| Maintenance systemic steroids, %                                         | NA             |            |
|                                                                          |                |            |
| <b>Burden of disease:</b>                                                |                |            |
| GOLD class (CCQ-based) A/B/C/D, %                                        | 12/35/7/47     | 473 (81%)  |
| CCQ total score, points                                                  | 2.18±1.17      | 525 (90%)  |
| CCQ symptom sub score, points                                            | 2.52±1.17      | 525 (90%)  |
| CCQ functional limitation sub score, points                              | 2.23±1.49      | 525 (90%)  |
| CCQ mental sub score, points                                             | 1.35±1.41      | 525 (90%)  |
| CCQ total score>1.0, %                                                   | 79             | 525 (90%)  |
| BODE index, points                                                       | 2.8±1.8        | 434 (74%)  |
| BODE quartile 1/2/3/4, %                                                 | 50/34/11/5     | 434 (74%)  |
|                                                                          |                |            |
| <b>Non-pharmacological interventions in primary care past 12 months:</b> |                |            |
| Patients receiving physiotherapy, %                                      | NA             |            |
| Patients receiving care from dietician, %                                | NA             |            |
| Patients receiving occupational therapy, %                               | NA             |            |
| Patients receiving care from psychologist, %                             | NA             |            |
|                                                                          |                |            |
| <b>Treatable traits:</b>                                                 |                |            |
| Smoking status, current/ex/never, %                                      | 53/45/2        | 584 (100%) |
| Activity-based dyspnea, MRC I/II/III/IV/V, %                             | 25/29/23/13/10 | 514 (88%)  |
| Number of exacerbation past year, 0/1/≥2 or ≥1 hospitalization, %        | 52/23/25       | 461 (79%)  |
| Nutritional status, BMI<21/BMI 21-25/BMI 25-30, BMI 30-35, BMI >35, %    | 18/29/33/14/6  | 584 (100%) |
| Fatigue, CIS-F score, points                                             | 37±13          | 563 (96%)  |
| Depressed mood, BDI score, points                                        | 2.0±2.5        | 577 (99%)  |
| Physical capacity, 6MWD (meter.); 6MWD %predicted                        | 461±123; 67±15 | 584 (100%) |

|                                                                             |           |            |
|-----------------------------------------------------------------------------|-----------|------------|
| Habitual physical activity, steps/day                                       | 5523±3364 | 584 (100%) |
| Activation for self-management, PAM score, points; PAM level I/II/III/IV, % | NA        |            |

Data are presented as n, %, n (%), mean±SD, 5<sup>th</sup>, 50<sup>th</sup> and 95<sup>th</sup> percentiles. FEV<sub>1</sub>=forced expiratory volume in 1 s; FVC=forced vital capacity; GOLD=Global Initiative on Obstructive Lung Disease; Hb=hemoglobin; p5=5th percentile, p50=50<sup>th</sup> percentile, p95=95<sup>th</sup> percentile; CCQ-Clinical COPD Questionnaire; MRC=Medical Research Council dyspnea scale; BMI=Body Mass Index; BDI=Beck Depression Inventory; CIS= Checklist Individual Strength-Fatigue; 6MWD=6-minute walking distance; PAM=Patient Activation Measure.

#### Legend Figure E1:

Figure E1. Prevalence of the eight TTs from the validation sample.

Figure E2. Frequencies of the total number of TTS per patients from the validation sample.

#### References:

- E1. van den Akker EF, van 't Hul AJ, Chavannes NH, Braunstahl GJ, van Bruggen A, Rutten-van Molken MP, et al. Development of an integral assessment approach of health status in patients with obstructive airway diseases: the CORONA study. *Int J Chron Obstruct Pulmon Dis.* 2015;10:2413-22.
- E2. Koolen EH, van der Wees PJ, Westert GP, Dekhuijzen R, Heijdra YF, van 't Hul AJ. The COPDnet integrated care model. *Int J Chron Obstruct Pulmon Dis.* 2018;13:2225-35.
- E3. Quanjer PH, Stanojevic S, Cole TJ, Baur X, Hall GL, Culver BH, et al. Multi-ethnic reference values for spirometry for the 3-95-yr age range: the global lung function 2012 equations. *The European respiratory journal.* 2012;40(6):1324-43.
- E4. Pellegrino R, Viegi G, Brusasco V, Crapo RO, Burgos F, Casaburi R, et al. Interpretative strategies for lung function tests. *Eur Respir J.* 2005;26(5):948-68.
- E5. Dar K, Williams T, Aitken R, Woods KL, Fletcher S. Arterial versus capillary sampling for analysing blood gas pressures. *Bmj.* 1995;310(6971):24-5.
- E6. Global strategy for the diagnosis, management, and prevention of chronic obstructive pulmonary disease - 2020 Report 2020 [Available from: [https://goldcopd.org/wp-content/uploads/2019/12/GOLD-2020-FINAL-ver1.2-03Dec19\\_WMV.pdf](https://goldcopd.org/wp-content/uploads/2019/12/GOLD-2020-FINAL-ver1.2-03Dec19_WMV.pdf)].
- E7. Koolen EH, van Hees HW, van Lummel RC, Dekhuijzen R, Djamin RS, Spruit MA, et al. "Can do" versus "do do": A Novel Concept to Better Understand Physical Functioning in Patients with Chronic Obstructive Pulmonary Disease. *J Clin Med.* 2019;8(3).

- E8. van der Molen T, Willemse BW, Schokker S, ten Hacken NH, Postma DS, Juniper EF. Development, validity and responsiveness of the Clinical COPD Questionnaire. Health and quality of life outcomes. 2003;1:13.
- E9. Smid DE, Franssen FME, Gonik M, Miravittles M, Casanova C, Cosio BG, et al. Redefining Cut-Points for High Symptom Burden of the Global Initiative for Chronic Obstructive Lung Disease Classification in 18,577 Patients With Chronic Obstructive Pulmonary Disease. *J Am Med Dir Assoc*. 2017;18(12):1097 e11- e24.
- E10. Celli BR, Cote CG, Marin JM, Casanova C, Montes de Oca M, Mendez RA, et al. The body-mass index, airflow obstruction, dyspnea, and exercise capacity index in chronic obstructive pulmonary disease. *N Engl J Med*. 2004;350(10):1005-12.
- E11. Puhan MA, Garcia-Aymerich J, Frey M, ter Riet G, Anto JM, Agusti AG, et al. Expansion of the prognostic assessment of patients with chronic obstructive pulmonary disease: the updated BODE index and the ADO index. *Lancet*. 2009;374(9691):704-11.
- E12. Mahler DA, Wells CK. Evaluation of clinical methods for rating dyspnea. *Chest*. 1988;93(3):580-6.
- E13. Obesity: preventing and managing the global epidemic. Report of a WHO consultation. *World Health Organ Tech Rep Ser*. 2000;894:i-xii, 1-253.
- E14. Vercoulen JH, Swanink CM, Fennis JF, Galama JM, van der Meer JW, Bleijenberg G. Dimensional assessment of chronic fatigue syndrome. *J Psychosom Res*. 1994;38(5):383-92.
- E15. Beck AT, Guth D, Steer RA, Ball R. Screening for major depression disorders in medical inpatients with the Beck Depression Inventory for Primary Care. *Behav Res Ther*. 1997;35(8):785-91.
- E16. Rademakers J, Nijman J, van der Hoek L, Heijmans M, Rijken M. Measuring patient activation in The Netherlands: translation and validation of the American short form Patient Activation Measure (PAM13). *BMC Public Health*. 2012;12:577.
